# Supplementary material
Source: Royal Society of Chemistry journal article supplement (doi:10.1039/d6cp00503a)
Supplement: d6cp00503a1.pdf [file d6cp00503a1.pdf]

## Supplementary Information

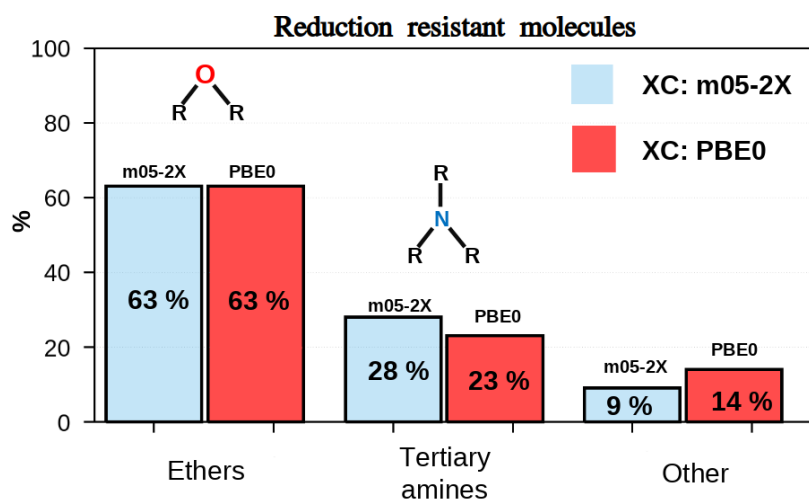

Figure S1: Comparison of the results obtained using the m05-2X and PBE0 exchange-correlation (XC) functionals. The fraction of reduction-resistant molecules in each chemical class is shown. The trend that tertiary amines constitute the second-largest family of reduction-resistant components is consistent across both functionals.

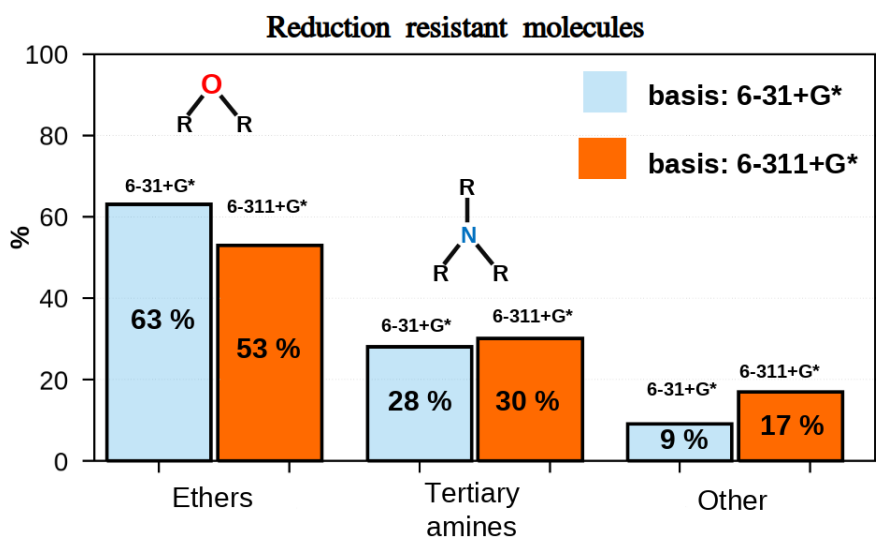

Figure S2: Comparison of the results obtained with the 6-31+G\* and 6-311+G\* basis sets using the m05-2X functional. The 6-311+G\* calculations were performed for a smaller randomly selected subset of 300 molecules. The fraction of reduction-resistant molecules in each chemical class is shown. The trend that tertiary amines constitute the second-largest family of reduction-resistant components is consistent across the two basis sets despite their different sizes.

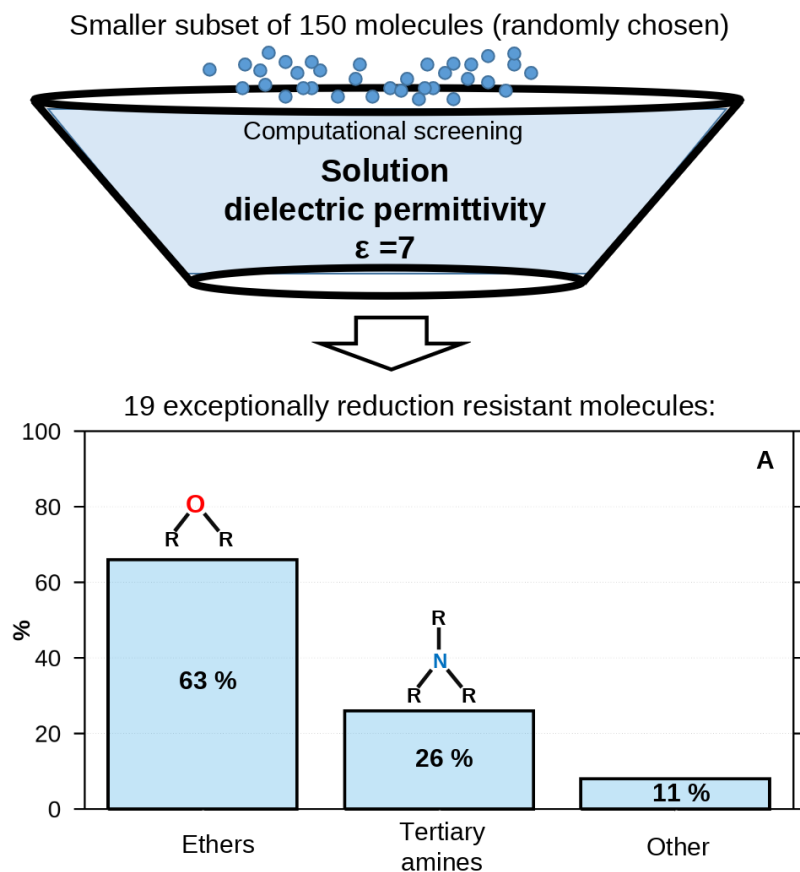

Figure S3: Sensitivity of the simulation results to the dielectric permittivity. Results at  $\epsilon=7$  closely match those at  $\epsilon=20$  reported in the main text, demonstrating no meaningful dependence on  $\epsilon$  over a reasonable range.

## 1 Calculated dataset

Table 1: Dataset with SMILES and cas corresponding to molecules, maximum atomic displacement during reduction  $d_{max}$  (Å) and  $E_{cdft}$  (eV) calculated via eq. (2)

| SMILES       | CAS       | $d_{max}$ | $E_{cDFT}$ |
|--------------|-----------|-----------|------------|
| CCCCN(C)C    | 927-62-8  | 0.227     | -1.582     |
| CC1(CO1)C=C  | 1838-94-4 | 2.780     | 2.236      |
| CCN(CC)CC    | 121-44-8  | 0.369     | -2.008     |
| CCC(C)C(=O)C | 565-61-7  | 0.452     | 0.583      |
| B(CC)(CC)CC  | 97-94-9   | 0.891     | 0.146      |
| C=CN1C=CN=C1 | 1072-63-5 | 1.157     | 0.409      |
| COC(=O)OC    | 616-38-6  | 0.686     | 1.567      |
| CCOC(C)(C)C  | 637-92-3  | 0.125     | -1.698     |
| CC(C)COC=C   | 109-53-5  | 1.069     | 0.574      |
| CN(C)CC##N   | 926-64-7  | 0.822     | 1.219      |
| C1=CON=C1    | 288-14-2  | 0.235     | 0.714      |
| COCC##C      | 627-41-8  | 1.297     | 2.275      |
| C1=NN=CO1    | 288-99-3  | 0.276     | 1.050      |
| CCOC=O       | 109-94-4  | 1.389     | 1.368      |
| CC1=CC=NC=C1 | 108-89-4  | 0.083     | 0.181      |

Continued on next page

| SMILES                          | CAS        | $d_{\max}$ | $E_{\text{cDFT}}$ |
|---------------------------------|------------|------------|-------------------|
| <chem>CCC(C)C1</chem>           | 78-86-4    | 1.388      | 3.376             |
| <chem>CC(C)CCC##N</chem>        | 542-54-1   | 0.842      | 0.884             |
| <chem>CN1CCCCC1</chem>          | 626-67-5   | 0.042      | -1.964            |
| <chem>CC(C)OC=O</chem>          | 625-55-8   | 1.363      | 1.256             |
| <chem>CCC(=O)OC</chem>          | 554-12-1   | 0.601      | 1.196             |
| <chem>CCCOC=O</chem>            | 110-74-7   | 1.416      | 1.359             |
| <chem>CCCCCC##N</chem>          | 628-73-9   | 0.726      | 0.946             |
| <chem>COC=O</chem>              | 107-31-3   | 1.111      | 1.507             |
| <chem>CCN1CCCC1=O</chem>        | 2687-91-4  | 2.176      | 0.499             |
| <chem>CCN(CC)C(=O)C</chem>      | 685-91-6   | 0.443      | 0.394             |
| <chem>CC1=C(OC(=N1)C)C</chem>   | 20662-84-4 | 1.442      | 0.537             |
| <chem>CC1COC(=O)O1</chem>       | 108-32-7   | 1.714      | 3.730             |
| <chem>C1CCN(CC1)C=O</chem>      | 2591-86-8  | 0.890      | 0.577             |
| <chem>CC1=C(N=CC=C1)C</chem>    | 583-61-9   | 0.571      | 0.410             |
| <chem>CCC1=CC=NC=C1</chem>      | 536-75-4   | 0.237      | 0.251             |
| <chem>CN(C)[Si](C)(C)C</chem>   | 2083-91-2  | 0.169      | -1.383            |
| <chem>CC1C(=NC(O1)C)C</chem>    | 22694-96-8 | 0.773      | 0.528             |
| <chem>CC1=CN=C(C=C1)C</chem>    | 589-93-5   | 1.019      | 0.427             |
| <chem>CC1=NC(=CC=C1)C</chem>    | 108-48-5   | 1.830      | 0.355             |
| <chem>CC1=C(C=NC=C1)C</chem>    | 583-58-4   | 0.111      | 0.109             |
| <chem>CC1=NCCS1</chem>          | 2346-00-1  | 0.364      | 0.763             |
| <chem>CCOCC=C(C)C</chem>        | 22094-00-4 | 1.434      | 2.333             |
| <chem>CC1=NCSC1</chem>          | 52558-99-3 | 0.582      | 0.445             |
| <chem>CN(C)CCN(C)C</chem>       | 110-18-9   | 0.594      | -2.237            |
| <chem>CO[Si](C)(C)C</chem>      | 1825-61-2  | 0.165      | -1.386            |
| <chem>CC1=CC(=NC=C1)C</chem>    | 108-47-4   | 0.353      | 0.083             |
| <chem>B(OC)(OC)OC</chem>        | 121-43-7   | 2.011      | 0.771             |
| <chem>COC(C=C)OC</chem>         | 6044-68-4  | 0.620      | -0.132            |
| <chem>CCC1COC(=O)O1</chem>      | 4437-85-8  | 0.405      | 1.709             |
| <chem>CC(C)C1=CC=NC=C1</chem>   | 696-30-0   | 0.434      | 0.352             |
| <chem>COC(=O)OC</chem>          | 3852-09-3  | 1.996      | 1.064             |
| <chem>CO[Si](C)(C)OC</chem>     | 1112-39-6  | 1.342      | 0.467             |
| <chem>CC(=O)OCCOC</chem>        | 110-49-6   | 1.698      | 1.200             |
| <chem>C1=CC=C(C=C1)C1</chem>    | 108-90-7   | 1.078      | 4.184             |
| <chem>CCCC1=CC=CC=N1</chem>     | 622-39-9   | 0.364      | 0.446             |
| <chem>C1COCN1C=O</chem>         | 4394-85-8  | 1.559      | 0.951             |
| <chem>CCC1=CN=C(C=C1)C</chem>   | 536-88-9   | 1.324      | 0.411             |
| <chem>CN(C)C(OC)OC</chem>       | 4637-24-5  | 3.560      | 2.966             |
| <chem>CC1=C(N=C(C=C1)C)C</chem> | 1462-84-6  | 0.917      | 0.276             |
| <chem>C1CCC(CC1)C1</chem>       | 542-18-7   | 1.842      | 3.433             |
| <chem>CN(C)CC(=O)OC</chem>      | 7148-06-3  | 1.869      | 0.982             |
| <chem>CC(=O)OCCCC=C</chem>      | 1576-85-8  | 0.635      | 1.244             |
| <chem>CCCCOC(=O)CC</chem>       | 590-01-2   | 1.419      | 0.972             |
| <chem>CCC=CCCCO=O</chem>        | 2315-09-5  | 0.611      | 1.329             |
| <chem>CC/C=C/CC(=O)OC</chem>    | 2396-78-3  | 1.812      | 1.175             |
| <chem>CCCC(=O)OCCC</chem>       | 105-66-8   | 1.814      | 1.163             |
| <chem>CCCC1CCC(=O)O1</chem>     | 105-21-5   | 0.371      | 0.978             |
| <chem>CC(C)(C)OCC1CO1</chem>    | 7665-72-7  | 2.008      | 2.563             |
| <chem>CC(=C)CCOC(=O)C</chem>    | 5205-07-2  | 1.024      | 0.994             |
| <chem>CCCCOCC1CO1</chem>        | 2426-08-6  | 0.927      | -1.509            |
| <chem>CCCC(C)C(=O)OC</chem>     | 2177-77-7  | 2.363      | 1.027             |
| <chem>CCOS(=O)(=O)C</chem>      | 62-50-0    | 0.561      | 3.359             |
| <chem>CC1COC(O1)CC(C)C</chem>   | 18433-93-7 | 0.867      | -1.496            |
| <chem>COC1=CC(=CC=C1)OC</chem>  | 151-10-0   | 1.070      | 0.044             |
| <chem>CCCCCC(=O)OCC</chem>      | 123-66-0   | 0.385      | 0.974             |

Continued on next page

| SMILES                 | CAS         | $d_{\max}$ | $E_{cDFT}$ |
|------------------------|-------------|------------|------------|
| CCCCC(=O)N(C)C         | 5830-30-8   | 0.687      | 0.467      |
| CC(=O)OCCSC            | 5862-47-5   | 2.125      | 1.183      |
| CN(C=O)C1=CC=CC=C1     | 93-61-8     | 1.089      | 0.598      |
| CCCCN1CCCC1=O          | 3470-98-2   | 0.378      | 0.288      |
| CCN(CC) [Si] (C) (C) C | 996-50-9    | 0.621      | -1.499     |
| CC(C)CC(C)CC(=O)C      | 19549-80-5  | 0.627      | 0.518      |
| CN(CCC##N)CCC##N       | 1555-58-4   | 1.813      | 1.046      |
| CCOCC(C)OC(=O)C        | 54839-24-6  | 2.924      | 1.012      |
| CCC(=O)OC(C)COC        | 148462-57-1 | 2.455      | 1.006      |
| C(CSCCC##N)C##N        | 111-97-7    | 0.755      | 1.153      |
| C[Si](C)(CC1)C1        | 1719-57-9   | 1.263      | 4.351      |
| CC(CCOC(=O)C)OC        | 4435-53-4   | 1.133      | 0.951      |
| CCOCCOCCOC             | 1002-67-1   | 0.441      | -1.986     |
| CC1=C(C=C(C=C1)C1)C    | 615-60-1    | 1.597      | 4.586      |
| C(C(F)F)(F)F           | 359-35-3    | 1.579      | 1.898      |
| C1=CC=C(C(=C1)F)F      | 367-11-3    | 1.068      | 1.531      |
| CC1=CC(=CC=C1)F        | 352-70-5    | 0.435      | 0.115      |
| CC1CCC(CC1)C(=O)OC     | 51181-40-9  | 1.486      | 0.937      |
| C=COCC(F)(F)F          | 406-90-6    | 0.631      | 2.622      |
| CCCCOC(=O)CC(C)C       | 109-19-3    | 0.324      | 1.086      |
| CCCCC1CCCC(=O)O1       | 3301-94-8   | 0.697      | 0.804      |
| CN(C)CCOCCN(C)C        | 3033-62-3   | 0.780      | -1.551     |
| CCCCC(CC)OC(=O)C       | 5921-83-5   | 2.435      | 0.999      |
| CC1=CC=C(C=C1)F        | 352-32-9    | 0.051      | -0.614     |
| C1C(O1)CF              | 503-09-3    | 0.827      | 2.803      |
| CC1(COC1=O)C           | 1955-45-9   | 0.714      | 3.026      |
| CC1CCOC1=O             | 1679-47-6   | 0.318      | 0.989      |
| CCCCOC=C               | 111-34-2    | 1.093      | 0.119      |
| CCCCOC=O               | 592-84-7    | 1.426      | 1.331      |
| COCOC=C                | 1663-35-0   | 1.705      | 0.068      |
| C=CCOCC=C              | 557-40-4    | 1.620      | 2.600      |
| CCC(C)(C)OC            | 994-05-8    | 0.126      | -1.946     |
| CC(C)(OC)OC            | 77-76-9     | 0.472      | -1.629     |
| CC(C)OC(=O)C           | 108-21-4    | 0.306      | 1.188      |
| CC(C)(C)OC=O           | 762-75-4    | 1.528      | 1.216      |
| CC(=C)OC(=O)C          | 108-22-5    | 1.189      | 2.679      |
| CC(C)C(=O)OC           | 547-63-7    | 1.517      | 0.922      |
| CCOCCC                 | 111-43-3    | 0.275      | -1.805     |
| CCOCC1CO1              | 4016-11-9   | 0.669      | 2.784      |
| CCOCCOCC               | 462-95-3    | 2.213      | -1.694     |
| CC(C)COC=O             | 542-55-2    | 1.688      | 1.330      |
| CCCC(=O)OC             | 623-42-7    | 1.461      | 0.969      |
| CC(=O)OCC=C            | 591-87-7    | 0.459      | 1.307      |
| CCC(=O)OCC             | 105-37-3    | 0.693      | 1.166      |
| CCCOC(=O)CC            | 106-36-5    | 0.711      | 0.837      |
| CN(C)C(=O)N(C)C        | 632-22-4    | 1.979      | 0.619      |
| COC1=CC=CO1            | 13679-46-4  | 1.942      | 1.808      |
| CCC(=O)OC(C)C          | 637-78-5    | 0.598      | 1.132      |
| CCOC(C)OCC             | 105-57-7    | 1.932      | -1.715     |
| CC(C)OCC1CO1           | 4016-14-2   | 0.292      | -1.703     |
| COC1CCC=CO1            | 4454-05-1   | 2.016      | -0.032     |
| CC(C)(C)C(=O)OC        | 598-98-1    | 1.493      | 0.986      |
| CCC1CCC(=O)O1          | 695-06-7    | 0.313      | 1.005      |
| CCOCCOCC               | 629-14-1    | 0.562      | -1.953     |
| CC(C)CCOC=O            | 110-45-2    | 0.467      | -1.470     |

Continued on next page

| SMILES                                        | CAS         | $d_{\max}$ | $E_{\text{cDFT}}$ |
|-----------------------------------------------|-------------|------------|-------------------|
| <chem>CCC1=C(OC(=N1)C)C</chem>                | 30408-61-8  | 0.981      | 0.470             |
| <chem>C1COC2=CC=CC=C21</chem>                 | 496-16-2    | 0.162      | -0.071            |
| <chem>CC(C)N1CCOCC1</chem>                    | 1004-14-4   | 0.245      | -1.506            |
| <chem>CC(C)CC(=O)C(C)C</chem>                 | 1888-57-9   | 0.573      | 0.514             |
| <chem>CCCCCCC1CO1</chem>                      | 2984-50-1   | 0.591      | 2.391             |
| <chem>CCCCC(=O)C(C)C</chem>                   | 13019-20-0  | 0.603      | 0.409             |
| <chem>CCCCC1=CC=CO1</chem>                    | 4466-24-4   | 0.762      | 0.049             |
| <chem>CCCCOCCCC</chem>                        | 142-96-1    | 0.146      | -2.106            |
| <chem>CCCCN1C=CN=C1</chem>                    | 4316-42-1   | 1.116      | -0.120            |
| <chem>CCC1CCC(O1)CC</chem>                    | 41239-48-9  | 0.278      | -1.652            |
| <chem>CC1=CC(=CC=C1)OC</chem>                 | 100-84-5    | 0.469      | -0.110            |
| <chem>CN1CN(CN(C1)C)C</chem>                  | 108-74-7    | 0.486      | -1.739            |
| <chem>CCC1=NC(=C(O1)C)C</chem>                | 53833-30-0  | 1.351      | 0.501             |
| <chem>C1[C@@H](O1)C2=CC=CC=C2</chem>          | 20780-54-5  | 2.095      | 2.143             |
| <chem>CC1=CC=C(C=C1)OC</chem>                 | 104-93-8    | 1.728      | -0.088            |
| <chem>CC1=C(SC(=N1)C)C</chem>                 | 13623-11-5  | 1.255      | 0.505             |
| <chem>COC1C=CC(O1)OC</chem>                   | 332-77-4    | 2.579      | 0.419             |
| <chem>CC1=CC=C(C=C1)C1</chem>                 | 106-43-4    | 1.279      | 4.213             |
| <chem>CCC1=NC(=CS1)C</chem>                   | 15679-12-6  | 0.863      | 0.696             |
| <chem>CCC1N=C(CS1)C</chem>                    | 41803-21-8  | 0.866      | 0.336             |
| <chem>CO[Si](C)(C=C)OC</chem>                 | 16753-62-1  | 1.972      | 0.432             |
| <chem>CC1=C(C=CO1)SC</chem>                   | 63012-97-5  | 0.556      | 0.120             |
| <chem>CC(C)C(=O)OC(C)C</chem>                 | 617-50-5    | 1.788      | 0.851             |
| <chem>CC(C)CCC(=O)OC</chem>                   | 2412-80-8   | 1.776      | 0.899             |
| <chem>CN1CCCN(C1=O)C</chem>                   | 7226-23-5   | 0.639      | 0.528             |
| <chem>CC1=CC(=CC=C1)C1</chem>                 | 108-41-8    | 1.828      | 4.975             |
| <chem>CCCCC(=O)OC</chem>                      | 106-70-7    | 1.894      | 0.937             |
| <chem>CCCC(C)OC(=O)C</chem>                   | 626-38-0    | 0.633      | 1.136             |
| <chem>CCOCCOC(=O)C</chem>                     | 111-15-9    | 2.698      | 0.773             |
| <chem>CCCOC(=O)CC(C)C</chem>                  | 557-00-6    | 1.209      | 0.608             |
| <chem>CCC/C=C/C(OC)OC</chem>                  | 18318-83-7  | 1.564      | 1.812             |
| <chem>CCC(C)C(=O)OC(C)C</chem>                | 66576-71-4  | 2.388      | 0.844             |
| <chem>CCC(C)CC(=O)OCC</chem>                  | 5870-68-8   | 0.665      | 1.056             |
| <chem>CCCCOCCOC=C</chem>                      | 4223-11-4   | 1.664      | 0.195             |
| <chem>CCOC(=O)CCCC=C</chem>                   | 54653-25-7  | 0.661      | 1.112             |
| <chem>CCCC(=O)OCC(=C)C</chem>                 | 7149-29-3   | 3.428      | 2.860             |
| <chem>CCC(CC)C(=O)OCC</chem>                  | 2983-38-2   | 0.938      | 0.733             |
| <chem>CCCCCOC(=O)CCC</chem>                   | 540-18-1    | 2.109      | 0.832             |
| <chem>CC=C(C)C1CCC(O1)(C)C</chem>             | 7416-35-5   | 1.167      | 1.673             |
| <chem>CC(CC(=O)OC)SC</chem>                   | 207983-28-6 | 0.850      | 1.308             |
| <chem>CC1=CCOC(C1)C=C(C)C</chem>              | 1786-08-9   | 0.430      | -0.383            |
| <chem>C[C@@H]1CO[C@@H]2[C@H]1CCC(=C2)C</chem> | 74410-10-9  | 1.385      | 1.575             |
| <chem>C1CCC(C1)C2CCCC2=O</chem>               | 4884-24-6   | 0.312      | 0.354             |
| <chem>CC1CCC(C(=O)C1)C(C)C</chem>             | 491-07-6    | 0.210      | 0.475             |
| <chem>CC(C)CCOCCC(C)C</chem>                  | 544-01-4    | 0.118      | -1.959            |
| <chem>C[C@H]1CC[C@@H](CC1=O)C(C)C</chem>      | 13163-73-0  | 0.157      | 0.320             |
| <chem>CC(=C)C1CCC2(C(C1)O2)C</chem>           | 1195-92-2   | 0.329      | -1.539            |
| <chem>CC1=C(OC(=N1)CC(C)C)C</chem>            | 26131-91-9  | 2.038      | 0.385             |
| <chem>CC(OC)OC</chem>                         | 534-15-6    | 0.611      | -1.870            |
| <chem>CC1(COC1)C</chem>                       | 6921-35-3   | 1.317      | 2.531             |
| <chem>COCCOC</chem>                           | 110-71-4    | 0.186      | -1.758            |
| <chem>C1COCOC1</chem>                         | 505-22-6    | 0.065      | -1.847            |
| <chem>C1C[C@@H]2[C@H](C1)O2</chem>            | 285-67-6    | 0.283      | -2.093            |
| <chem>CC1COCOC1</chem>                        | 1072-47-5   | 0.642      | -1.518            |
| <chem>C1CCOCC1</chem>                         | 142-68-7    | 0.060      | -2.048            |

Continued on next page

| SMILES                 | CAS        | $d_{\max}$ | $E_{\text{cDFT}}$ |
|------------------------|------------|------------|-------------------|
| COCC1CO1               | 930-37-0   | 0.289      | -1.614            |
| CC(C)(C)OC             | 1634-04-4  | 0.090      | -1.998            |
| CC1CCOC1               | 13423-15-9 | 0.154      | -1.615            |
| CCCOC                  | 628-32-0   | 0.616      | -1.858            |
| CCCCOC                 | 628-28-4   | 0.129      | -1.698            |
| CC1CC(=O)O1            | 3068-88-0  | 0.341      | 1.488             |
| CN1C=CN=C1             | 616-47-7   | 1.159      | 0.142             |
| CC1CCCCO1              | 96-47-9    | 0.124      | -1.620            |
| CC1=NCCO1              | 1120-64-5  | 0.829      | 0.819             |
| C1CC(=O)OC1            | 96-48-0    | 1.337      | 2.966             |
| CCOCC=C                | 557-31-3   | 1.471      | 2.557             |
| CN1C=CC=N1             | 930-36-9   | 0.892      | 0.108             |
| C1CC=COC1              | 110-87-2   | 0.484      | 0.040             |
| C1C(O1)C2CO2           | 298-18-0   | 0.640      | 2.898             |
| CC1=CC=CO1             | 534-22-5   | 0.417      | 0.025             |
| CC1COC(O1)C            | 3390-12-3  | 0.474      | -1.595            |
| CCN(CC)C=O             | 617-84-5   | 1.390      | 0.735             |
| C[Si](C)(C)C##N        | 7677-24-9  | 0.536      | 0.588             |
| CC1(COC1=O)C           | 1955-45-9  | 0.743      | 2.975             |
| CC1N=C(CO1)C           | 77311-02-5 | 0.685      | 0.739             |
| CCC1=NCCO1             | 10431-98-8 | 0.765      | 0.561             |
| CCC(C)OCC              | 2679-87-0  | 0.103      | -2.018            |
| CN(C)CCC##N            | 1738-25-6  | 0.745      | 1.087             |
| CCC1=CC=CO1            | 3208-16-0  | 1.158      | -0.013            |
| CC(C)OC(C)C            | 108-20-3   | 0.241      | -1.819            |
| CN1CCOCC1              | 109-02-4   | 0.100      | -1.680            |
| CC1=CC=C(O1)C          | 625-86-5   | 0.680      | -0.018            |
| CCCCOCC                | 628-81-9   | 0.225      | -1.778            |
| CC1(C(O1)(C)C)C        | 5076-20-0  | 0.082      | -2.120            |
| C1CC[C@H]2[C@@H](C1)O2 | 286-20-4   | 0.627      | 2.292             |
| C1CCN(C1)C=O           | 3760-54-1  | 0.776      | 0.592             |
| C=CCN1C=CN=C1          | 31410-01-2 | 1.692      | 0.356             |
| COC1=CC=CC=C1          | 100-66-3   | 1.387      | -0.123            |
| CC(CCC##N)C##N         | 4553-62-2  | 0.771      | 1.098             |
| C[Si](C)(C)C1          | 75-77-4    | 1.019      | 2.832             |
| C1CC=C(C1)CC##N        | 22734-04-9 | 0.927      | 1.020             |
| CCCC1=CC=CO1           | 4229-91-8  | 2.184      | 0.049             |
| COC(OC)OC              | 149-73-5   | 0.468      | -1.837            |
| C1CCS(=O)C1            | 1600-44-8  | 0.671      | 1.928             |
| CCOC(=O)OC             | 623-53-0   | 0.681      | 1.452             |
| CN1CCN(CC1)C           | 106-58-1   | 0.139      | -1.817            |
| CCN1CCCCC1             | 766-09-6   | 0.473      | -1.932            |
| CCCCCOC                | 4747-07-3  | 0.107      | -1.613            |
| CCCCCCC##N             | 629-08-3   | 0.670      | 0.946             |
| CC(=O)OC(C)(C)C        | 540-88-5   | 0.476      | 1.158             |
| CCCCCOC=O              | 638-49-3   | 1.784      | 1.348             |
| CC(C)CC(=O)OC          | 556-24-1   | 0.982      | 0.929             |
| CCC(C)C(=O)OC          | 868-57-5   | 0.715      | 1.304             |
| COC(=O)CCC=C           | 818-57-5   | 2.037      | 1.299             |
| CCCCC(=O)OC            | 624-24-8   | 1.460      | 0.984             |
| CCC(C)OC(=O)C          | 105-46-4   | 2.179      | 0.960             |
| CCO[Si](C)(C)C         | 1825-62-3  | 0.151      | -1.497            |
| C1CCC(=O)OCC1          | 502-44-3   | 0.338      | 0.806             |
| CCN(C(C)C)C(C)C        | 7087-68-5  | 0.545      | -2.044            |
| CC1=CC(=NC(=C1)C)C     | 108-75-8   | 0.181      | -0.133            |

Continued on next page

| SMILES                | CAS        | $d_{\max}$ | $E_{\text{cDFT}}$ |
|-----------------------|------------|------------|-------------------|
| CCCCN(CC)CC           | 4444-68-2  | 0.392      | -1.852            |
| C1=CC=C(C=C1)CC##N    | 140-29-4   | 0.314      | -0.120            |
| CN(C)C1CCCCC1         | 98-94-2    | 0.113      | -1.933            |
| C1CC(OC1)CC1          | 3003-84-7  | 2.444      | 4.101             |
| CCOC(=O)OCC           | 105-58-8   | 0.940      | 1.516             |
| CC1=C(N=C(C=C1)C)C    | 1462-84-6  | 1.051      | 0.308             |
| CC(OC)(OC)OC          | 1445-45-0  | 0.281      | -1.680            |
| CCCCCCCC##N           | 2243-27-8  | 0.750      | 0.873             |
| CC1=CC=C(C=C1)N(C)C   | 99-97-8    | 0.358      | -0.308            |
| CN(C)CC1=CC=CC=C1     | 103-83-3   | 0.514      | -0.322            |
| C1=CC=C(C=C1)CCC##N   | 645-59-0   | 0.679      | 1.020             |
| C[Si](C)(CC=C)C1      | 4028-23-3  | 1.731      | 3.096             |
| CN1C=CC2=CC=CC=C21    | 603-76-9   | 0.723      | -0.043            |
| CC1=CC=CC=C1N(C)C     | 609-72-3   | 1.582      | -0.251            |
| CC([Si](C)(C)C)C1     | 7787-87-3  | 1.251      | 3.650             |
| CC1=CC(=CC=C1)N(C)C   | 121-72-2   | 0.442      | -0.319            |
| CCCC(=O)OCCC          | 141-06-0   | 0.706      | 1.107             |
| CCCCC1OCC(O1)C        | 74094-60-3 | 1.995      | -1.515            |
| CCCC1CCCC(=O)O1       | 698-76-0   | 0.520      | 0.709             |
| CN(C)[Si](C)(C)N(C)C  | 3768-58-9  | 2.510      | -1.251            |
| CCCCCCCC##N           | 1975-78-6  | 0.748      | 0.962             |
| CC(C)CCN=CCC(C)C      | 35448-31-8 | 1.279      | 0.073             |
| CC1(CCCC(N1C)(C)C)C   | 79-55-0    | 0.213      | -1.938            |
| CCOC(OCC)OCC          | 122-51-0   | 0.739      | -1.709            |
| CC1(CO1)C             | 558-30-5   | 1.875      | 2.531             |
| CC1(CO1)C=C           | 1838-94-4  | 2.789      | 2.317             |
| C1CC1C##N             | 5500-21-0  | 0.555      | 1.134             |
| C1CO1                 | 75-21-8    | 0.045      | -1.863            |
| COC                   | 115-10-6   | 0.045      | -1.837            |
| C/C=C/CC##N           | 16529-66-1 | 0.780      | 1.049             |
| C=COC=C               | 109-93-3   | 0.454      | 0.720             |
| CN(C)C##N             | 1467-79-4  | 0.966      | 1.517             |
| [2H]C([2H])([2H])C##N | 2206-26-0  | 0.407      | 1.086             |
| CC(=C)OC              | 116-11-0   | 0.895      | -0.125            |
| C1=COC=C1             | 110-00-9   | 0.310      | 0.139             |
| CC##N                 | 75-05-8    | 0.406      | 1.015             |
| CCC1CO1               | 106-88-7   | 0.594      | 2.507             |
| CC(C)C1               | 75-29-6    | 1.553      | 3.559             |
| CCN(C)C               | 598-56-1   | 0.063      | -2.111            |
| CC(C)C##N             | 78-82-0    | 0.718      | 0.985             |
| CN1C=CC=C1            | 96-54-8    | 1.289      | -0.352            |
| CN(C)CC##C            | 7223-38-3  | 0.658      | 1.216             |
| C1COC1                | 646-06-0   | 0.839      | 2.968             |
| C1C=CC1               | 1708-29-8  | 0.274      | 0.141             |
| COCOC                 | 109-87-5   | 0.252      | -1.587            |
| C1COC1                | 503-30-0   | 0.080      | -1.734            |
| CC(C=C)C##N           | 16529-56-9 | 0.733      | 1.157             |
| CCOC=C                | 109-92-2   | 1.346      | 0.077             |
| CCCC##N               | 110-59-8   | 0.827      | 0.915             |
| CCCC##N               | 109-74-0   | 0.602      | 0.962             |
| C=CCCC##N             | 592-51-8   | 0.821      | 0.959             |
| CDOC                  | 690-02-8   | 0.471      | 2.891             |
| C1CCOC1               | 109-99-9   | 0.064      | -2.102            |
| CC1CO1                | 75-56-9    | 0.061      | -1.459            |
| CCC##N                | 107-12-0   | 0.603      | 1.011             |

Continued on next page

| SMILES                        | CAS        | $d_{\max}$ | $E_{\text{cDFT}}$ |
|-------------------------------|------------|------------|-------------------|
| <chem>CN1CCCC1</chem>         | 120-94-5   | 0.101      | -1.896            |
| <chem>CCOC</chem>             | 540-67-0   | 0.522      | -1.738            |
| <chem>C1COC=C1</chem>         | 1191-99-7  | 0.624      | 0.392             |
| <chem>CC(C)N(C)C</chem>       | 996-35-0   | 0.167      | -2.079            |
| <chem>C1COC1=O</chem>         | 57-57-8    | 0.884      | 3.182             |
| <chem>CCCOC</chem>            | 557-17-5   | 0.261      | -2.053            |
| <chem>CCCN(C)C</chem>         | 926-63-6   | 0.256      | -1.618            |
| <chem>CCOCC</chem>            | 60-29-7    | 0.114      | -1.924            |
| <chem>C=CCC##N</chem>         | 109-75-1   | 0.694      | 1.107             |
| <chem>CC1C(O1)C</chem>        | 3266-23-7  | 0.157      | -1.875            |
| <chem>CS(=O)C</chem>          | 67-68-5    | 0.120      | -1.969            |
| <chem>COC=C</chem>            | 107-25-5   | 1.064      | 0.102             |
| <chem>CCCCC(=O)OCCCC</chem>   | 591-68-4   | 0.673      | 1.106             |
| <chem>CCCCC(CC)C(=O)OC</chem> | 816-19-3   | 1.819      | 0.850             |
| <chem>CCCCCCC(OC)OC</chem>    | 10032-05-0 | 0.160      | -1.822            |
